# Supplementary material
Source: MDPI journal article supplement (https://www.mdpi.com/2073-4344/11/8/924)
Supplement: s1 [file s1 › catalysts-1242525-supplementary.pdf]

## Supplementary Materials

# Photocatalytic Study of Cyanide Oxidation Using Titanium Dioxide (TiO<sub>2</sub>)-Activated Carbon Composites in a Continuous Flow Photo-Reactor

Stalin Coronel, Ana Belén Lozada, Lucía E. Manangón-Perugachi, Ernesto de la Torre and Diana Endara \*

Department of Extractive Metallurgy, Escuela Politécnica Nacional, Ladrón de Guevara E11-253, Quito 170517, Ecuador; stalin.coronel@epn.edu.ec (S.C.); ana.lozada@epn.edu.ec (A.B.L.); lucia.manangon@epn.edu.ec (L.E.M.-P.); ernesto.delatorre@epn.edu.ec (E.d.l.T.)

\* Correspondence: diana.endara@epn.edu.ec; Tel.: +593-(9)9854-9231

### Physical and chemical characterization of GCR-20 activated carbon and TiO<sub>2</sub>-AC composite

SEM micrographs are presented in Figure S1. A porous network was observed in the AC (Figure S1 (a)) and the TiO<sub>2</sub>-AC composite (Figure S1 (b)). Some white zones were observed in the micrograph of TiO<sub>2</sub>-AC composite, indicating the impregnation of TiO<sub>2</sub> on the largest pores of the AC surface. This was confirmed by the EDX mapping (Figure S1 (c)).

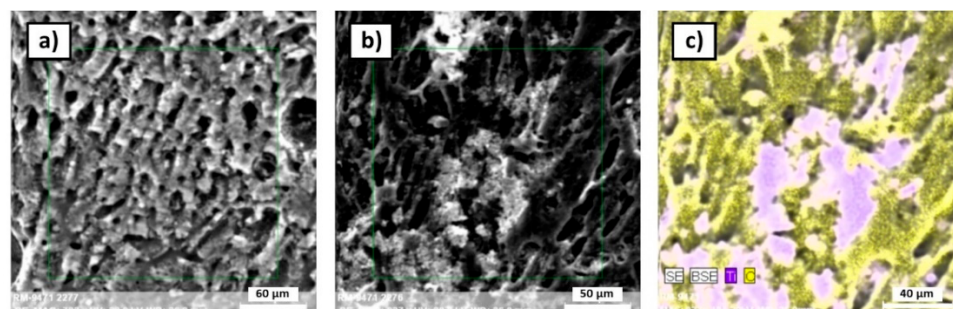

**Figure S1.** (a) SEM micrograph of AC, 783x; (b) SEM micrograph of TiO<sub>2</sub>-AC composite, 927x; (c) EDX mapping performed on the micrograph of the TiO<sub>2</sub>-AC composite, 927x. Titanium is shown in violet and carbon in yellow.

A SEM micrograph was performed on a different section of the TiO<sub>2</sub>-AC composite. As shown in Figure S2, a different degree of titanium impregnation was observed, compared to Figure S1(c). Therefore, TiO<sub>2</sub> was impregnated heterogeneously on the carbon surface.

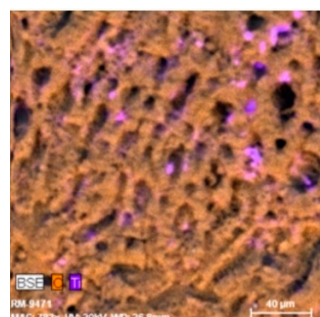

**Figure S2.** EDX mapping performed on a micrograph of the TiO<sub>2</sub>-AC composite, 783x. Titanium is shown in violet and carbon in orange.

**Citation:** Coronel, S.; Lozada, A.B.; Manangón-Perugachi, L.E.; de la Torre, E.; Endara, D. Photocatalytic Study of Cyanide Oxidation Using Titanium Dioxide (TiO<sub>2</sub>)-Activated Carbon Composites in a Continuous Flow Photo-Reactor. *Catalysts* **2021**, *11*, 924. <https://doi.org/10.3390/catal11080924>

Academic Editors: José Ignacio Lombraña, Héctor Valdés, Cristian Ferreiro, Maria Angeles Lillo Rodenas and Giuseppina Iervolino,

Received: 16 May 2021

Accepted: 27 July 2021

Published: 30 July 2021

**Publisher's Note:** MDPI stays neutral with regard to jurisdictional claims in published maps and institutional affiliations.

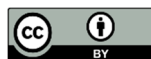

**Copyright:** © 2021 by the authors. Licensee MDPI, Basel, Switzerland. This article is an open access article distributed under the terms and conditions of the Creative Commons Attribution (CC BY) license (<http://creativecommons.org/licenses/by/4.0/>).
